# Supplementary material for: “We carry too many burdens”: Lived experiences of girls’ schooling in Ghana, a critical look at barriers, gender norms, and institutional perspectives
Source: Research Square preprint supplement (doi:10.21203/rs.3.rs-7712315/v1), 2025-11-11
Supplement: Supplementary file 1 [file 8ec47cb0947696a0c351c62b.docx]

**UNIVERSITY OF GHANA**

**COLLEGE OF HUMANITIES**

REGIONAL INSTITUTE FOR POPULATION STUDIES

**INSTRUMENT 5: KEY INFORMANT INTERVIEW GUIDE WITH SHEP COORDINATORS**

**THESIS TOPIC: AVAILABILITY OF SCHOOL-BASED WASH FACILITIES: IMPLICATIONS FOR MENSTRUAL HYGIENE MANAGEMENT, SCHOOL ATTENDANCE AND LEARNING OUTCOMES IN GHANA**


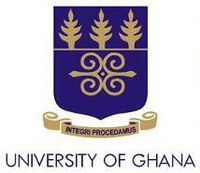


**BY**

**JONES AGYAPONG FRIMPONG**

**Instruction:** The Key Informant Interview (KII) is to be administered to School Health and Education Project (SHEP) Teachers/Coordinators at the school level.

1. **Background details:**

**Note:** Researcher to complete this template before or after the Interview:

| **S/N** | **Participant Details** | | | |
| --- | --- | --- | --- | --- |
|  | Name of School |  | | |
|  | Region |  | | |
|  | District |  | | |
|  | Locality Type | Rural Urban | | |
|  | Name of Teacher/SHEP Coordinator |  | | |
|  | Tel. No. of Teacher/SHEP Coordinator |  | | |
| **Moderator Details** | | | | |
|  | Name of Moderator |  | | |
|  | Tel. No. of Moderator |  | | |
|  | Date |  | | |
|  | Start Time: |  | End time: |  |

**Introduction:**

Hello…my name is ____________­­­­­­­______________I am a student of the Regional Institute for Population Studies (RIPS), University of Ghana, Legon currently working on my PhD thesis on the topic above.

The purpose of this discussion is to understand your views on WASH facilities and how they impact on the menstrual hygiene management, school attendance & learning outcomes of your students. None of your answers will be available to anyone at any time. All the information you give will be kept private and your name will not be put anywhere on this tool. If you decide not to participate in this survey, you may withdraw at any point of the interview. However, I really need your honest response to better understand how access to WASH facilities in your school influences the menstrual hygiene management and practices of girls and how these in turn affects school attendance and learning in schools among female students.

The results of the study would hopefully serve as an important input to intervention programmes that aim at improving adolescent girls’ health in general and students in particular. It will take about 1-hour to complete the discussion.

1. **Introductory Questions:**
2. Can you tell me about the Water, Sanitation and Hygiene (WASH) situation in this school? (*Probe for general availability of WASH facilities – separate for each sex, different for teacher/students, functionality of the facilities etc.*)

…………………………………………………………………………………………………

…………………………………………………………………………………………………

1. What is the usual conditions of the water, sanitation and hygiene (WASH) facilities available and being used in this school? *(Probe for the types of WASH facilities, number, current functionality of the facilities etc.)*

…………………………………………………………………………………………………

…………………………………………………………………………………………………

1. Is this school friendly for menstruating girls?*(Probe for access to changing rooms, support from teachers, SHEP Coordinator etc.)*

…………………………………………………………………………………………………

…………………………………………………………………………………………………

1. **Menstruation and Menstrual Hygiene Management (MHM):**
2. Do girls receive menstruation and menstruation management-related education at the school?

- Yes
- No

1. If yes, how is menstruation-related education taught at the school?

- As a component of the core curriculum (e.g., in science class)
- As a stand-alone special module on menstrual hygiene exclusively
- Through a school-sponsored extracurricular program (e.g., health clubs)
- Only sporadically/informally/occasionally when girls ask
- Only sporadically/informally/occasionally when teachers perceive girls need information
- Other: ____________

1. If yes, can you explain what is covered in the education session?

- Information provided is about biological reasons for menstruation
- Information provided teaches girls about managing menstruation,
- Hygiene, how to clean/use cloths, etc.
- Information provided includes information about reproductive health
- Other: _______________________________________________________________________

1. Are teachers at this school trained on menstrual health and hygiene promotion/education? If yes, please tell me about the training?

…………………………………………………………………………………………………

…………………………………………………………………………………………………

1. Are sanitary materials available for girls at the school level? If yes, how are they made available? *(Probe: who funds; do girls pay for them; how are they distributed? do girls need to ask for them?)*

…………………………………………………………………………………………………

…………………………………………………………………………………………………

1. **School Attendance:**
2. Can you tell me if girls are expected to come to school while menstruating? *(Probe: why, do girls abide by these expectations, what do girls’ parents think, etc.)*

…………………………………………………………………………………………………

…………………………………………………………………………………………………

1. In many schools, girls miss school or leave school early when they are menstruating - How often does that happen at this school? *(Probe: frequency, certain girls only/specifically, etc).*

…………………………………………………………………………………………………

…………………………………………………………………………………………………

1. What are the other reasons why girls in your school miss school days? *(Probe for distance to school, work-related support to family, household chores, caregiving etc.).*

…………………………………………………………………………………………………

…………………………………………………………………………………………………

1. What do you think schools can do to make it easier for girls to be in school during menstruation? *(Probe: education, facilities, support, resources, etc.)*

…………………………………………………………………………………………………

…………………………………………………………………………………………………

1. **Learning (outcomes)**
2. What is learning like for girls in this school/your class when they are menstruating? *(Probe for difficulty in concentration, tiredness, participation in class activities etc.)*

…………………………………………………………………………………………………

…………………………………………………………………………………………………

1. Has any of your students missed an exams or class test as a result of menstruation? *(Probe for why they missed the exams, class test, the frequency, what happened etc…)*

…………………………………………………………………………………………………

…………………………………………………………………………………………………

1. When your students miss school days as a result of menstruation, does it affect their learning outcomes (examination results) in any way? *(Probe for ways missing school affects their performance in exams and class test…)*

…………………………………………………………………………………………………

…………………………………………………………………………………………………

**Exit Questions**

1. What recommendations will you give to improve the resources for managing your menstruation at the school level? *(Probe for WASH facilities, access to menstrual hygiene materials etc.)*

……………………………………………………………………………………………………………………………………………………………………………………………………

1. Do you have any questions for me?

…………………………………………………………………………………………………..

…………………………………………………………………………………………………..

**Thank you for your participation**
