# Supplementary material for: “We carry too many burdens”: Lived experiences of girls’ schooling in Ghana, a critical look at barriers, gender norms, and institutional perspectives
Source: Research Square preprint supplement (doi:10.21203/rs.3.rs-7712315/v1), 2025-11-11
Supplement: Supplementary file 2 [file f5516448dfdb7c30bc7562d2.docx]

**UNIVERSITY OF GHANA**

**COLLEGE OF HUMANITIES**

REGIONAL INSTITUTE FOR POPULATION STUDIES

**INSTRUMENT 3: FOCUS GROUP DISCUSSION WITH GIRLS**

**THESIS TOPIC: AVAILABILITY OF SCHOOL-BASED WASH FACILITIES: IMPLICATIONS FOR MENSTRUAL HYGIENE MANAGEMENT, SCHOOL ATTENDANCE AND LEARNING OUTCOMES IN GHANA**


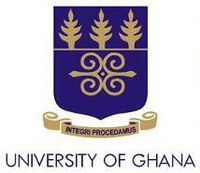


**BY**

**JONES AGYAPONG FRIMPONG**

**Instruction:** The Focus Group Discussion (FGD) is to be administered to students **(Girls only)** at either **Primary 5 and 6** (only one at the primary level) who have attained menarche and students in Junior High School **(JHS) (either 1 or 2)** who have also attained menarche. (About 6-10 girls should be selected using a systematic random approach).

1. **Background details:**

**Note:** Moderator to complete this template before or after the FGD:

| **S/N** | **Part A1: Participants Details** | | | | |
| --- | --- | --- | --- | --- | --- |
|  | Name of School |  | | | |
|  | Region |  | | | |
|  | District |  | | | |
|  | Locality Type | Rural Urban | | | |
| **PART A2: Information on FGD Participants** | | | | | |
| **S/N** | **Name** | **Class** | | **Tel. No. (if any…)** | |
|  |  |  | |  | |
|  |  |  | |  | |
|  |  |  | |  | |
|  |  |  | |  | |
|  |  |  | |  | |
|  |  |  | |  | |
|  |  |  | |  | |
|  |  |  | |  | |
|  |  |  | |  | |
| **Moderator Details** | | | | | |
|  | Name of Moderator |  | | | |
|  | Tel. No. of Moderator |  | | | |
|  | Date |  | | | |
|  | Start Time: |  | End time: | |  |

**FGD Starts:** The moderator greets the participants and explains the objectives of the focus group and reviews the rules. This is a guide to questioning in the focal groups.

**Introduction:**

Hello…my name is ____________­­­­­­­______________I am a student of the Regional Institute for Population Studies (RIPS), University of Ghana, Legon currently working on my PhD thesis on the topic above.

The purpose of this discussion is to understand your views and personal experiences on WASH facilities, your menstrual hygiene practices and how these affect your attendance to school and your learning outcomes. There are no right or wrong answers to any of the questions. I want your personal opinions, and everyone’s opinion is equally important to me. This will take about 1-hour. Before we get started, here are few things to note:

***(Voluntary)***

It is important that you know you do not have to talk with me today. It is okay to choose not to talk with to me. If you choose to talk with me today, you can decide not to answer every question. Also, you can stop talking when you want to.

***(Confidentiality)***

I will not share your specific answers with anybody so do not be worried about what you tell us. It is important you equally keep the views of others in this group private as well. I will share the information in a way that does not let people know who came to this group today, or who said what. Your name will not be on any reports or presentations that I put together.

***(Taping etiquette)***

You may see me writing things down; this is so I don’t forget anything we talk about. I am also tape recording our discussions so that I will be able to remember exactly what you tell me. In order for the tape recording to work well, only one person can talk at a time so that we can hear everything that everyone says.

1. I would like each person to fully participate in this discussion…to talk one at a time.
2. I need to hear from everyone in the course of the discussion, but you don’t have to answer every question.
3. Respect for opinions: You may find that you disagree with an opinion shared here by your colleague student. Please voice your disagreement respectfully.
4. You were all randomly selected to participate in this session, and I appreciate that you have taken time to be a part of this FGD.

Does anyone have any questions about what I just talked about? Okay, let’s begin…

**WARM-UP QUESTIONS: (5-10 min.)**

I will like to know each of you a little bit, so please introduce yourself and tell me a bit about yourself:

- Your name
- Your age
- Your class
- Tell us about family / parents / siblings / profession of parents / who you are living with?
- What do you like most about being in school?

1. **Introductory Questions:**
2. Can you tell me about the Water, Sanitation and Hygiene (WASH) situation in this school? (*Probe for general availability of WASH facilities – separate for each sex, different for teacher/students, functionality of the facilities etc.*)

…………………………………………………………………………………………………

…………………………………………………………………………………………………

1. Can you all describe the types and usual conditions of the water, sanitation and hygiene (WASH) facilities available and being used in this school? *(Probe for the types of WASH facilities, number, current functionality of the facilities etc.)*

…………………………………………………………………………………………………

…………………………………………………………………………………………………

1. Is this school friendly for menstruating girls?*(Probe for access to changing rooms, support from teachers, SHEP Coordinator etc.)*

…………………………………………………………………………………………………

…………………………………………………………………………………………………

1. **Menstruation and Menstrual Hygiene Management (MHM):**
2. Can you describe a typical day when you have your period? What do you usually feel in the morning?

…………………………………………………………………………………………………

…………………………………………………………………………………………………

- 1. What time do you get to school on such days? (Do you report late or the usual time)

…………………………………………………………………………………………………

…………………………………………………………………………………………………

- 1. What activities do you engage in with friends on such days?

…………………………………………………………………………………………………

…………………………………………………………………………………………………

1. Are you able to change your sanitary pad or cloth at school during these days?
   1. Where do you do this?
   2. What else do you do to make sure you feel comfortable during such periods?
2. What materials do you or your friends use during menstruation? *(Probe for the usage of disposable pads, toilet rolls, reusable dry cloth, paper etc.)*

…………………………………………………………………………………………………

…………………………………………………………………………………………………

1. Where do you usually dispose off your used menstrual materials? *(Probe for dustbins, drains, etc.)*

…………………………………………………………………………………………………

…………………………………………………………………………………………………

1. **School Attendance:**
2. Do some of your mates or yourself ever absent herself/yourself from school due to menstruation? Why?

…………………………………………………………………………………………………

…………………………………………………………………………………………………

1. How often do you or your mates absent yourself from school as a result of menstruation? *(Probe for approximate number of days per month…)*

…………………………………………………………………………………………………

…………………………………………………………………………………………………

1. What was the reason for absenting yourself from school as a result of menstruation? *(Probe for cultural myths, absence of WASH facilities, shyness, fear of staining dress etc.)*

…………………………………………………………………………………………………

…………………………………………………………………………………………………

1. What are the other reasons why girls miss school days? *(Probe for distance to school, work-related support to family, household chores, caregiving etc.).*
2. **Learning (outcomes)**
3. What is learning like during such menstruating days? *(Probe for difficulty in concentration, tiredness, participation in class activities etc.)*

…………………………………………………………………………………………………

…………………………………………………………………………………………………

1. Has any of you or your friends missed an exams or class test as a result of menstruation? *(Probe for why they missed the exams, class test, the frequency, what happened etc…)*

…………………………………………………………………………………………………

…………………………………………………………………………………………………

1. When your friends or yourself miss school days as a result of menstruation, does it affect your class test or examination results in any way? *(Probe for ways missing school affects their performance in exams and class test…)*

…………………………………………………………………………………………………

…………………………………………………………………………………………………

**Exit Questions**

1. What recommendations will you give to improve the resources for managing your menstruation at the school level? *(Probe for WASH facilities, access to menstrual hygiene materials etc.)*

……………………………………………………………………………………………………………………………………………………………………………………………………

1. Do you have any questions for me?

…………………………………………………………………………………………………..

…………………………………………………………………………………………………..

**Thank you for your participation**
